# Supplementary material
Source: PubMed Central journal article supplement (PMC4737088)

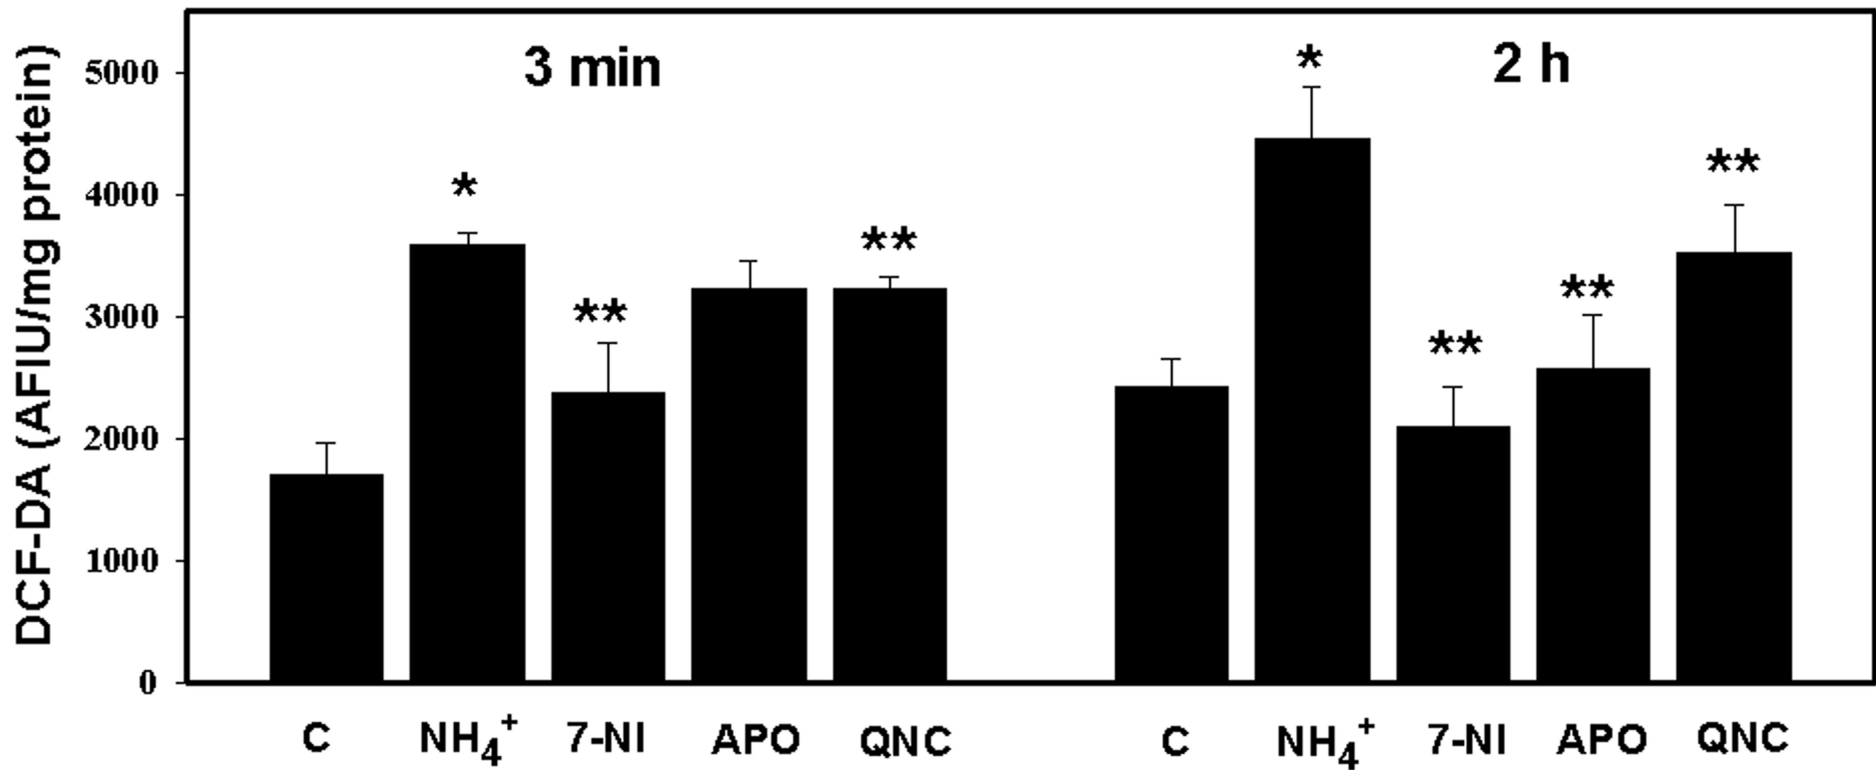

Supplement: NIHMS106246-supplement-Supp_Fig_1.pdf [file NIHMS106246-supplement-Supp_Fig_1.pdf]

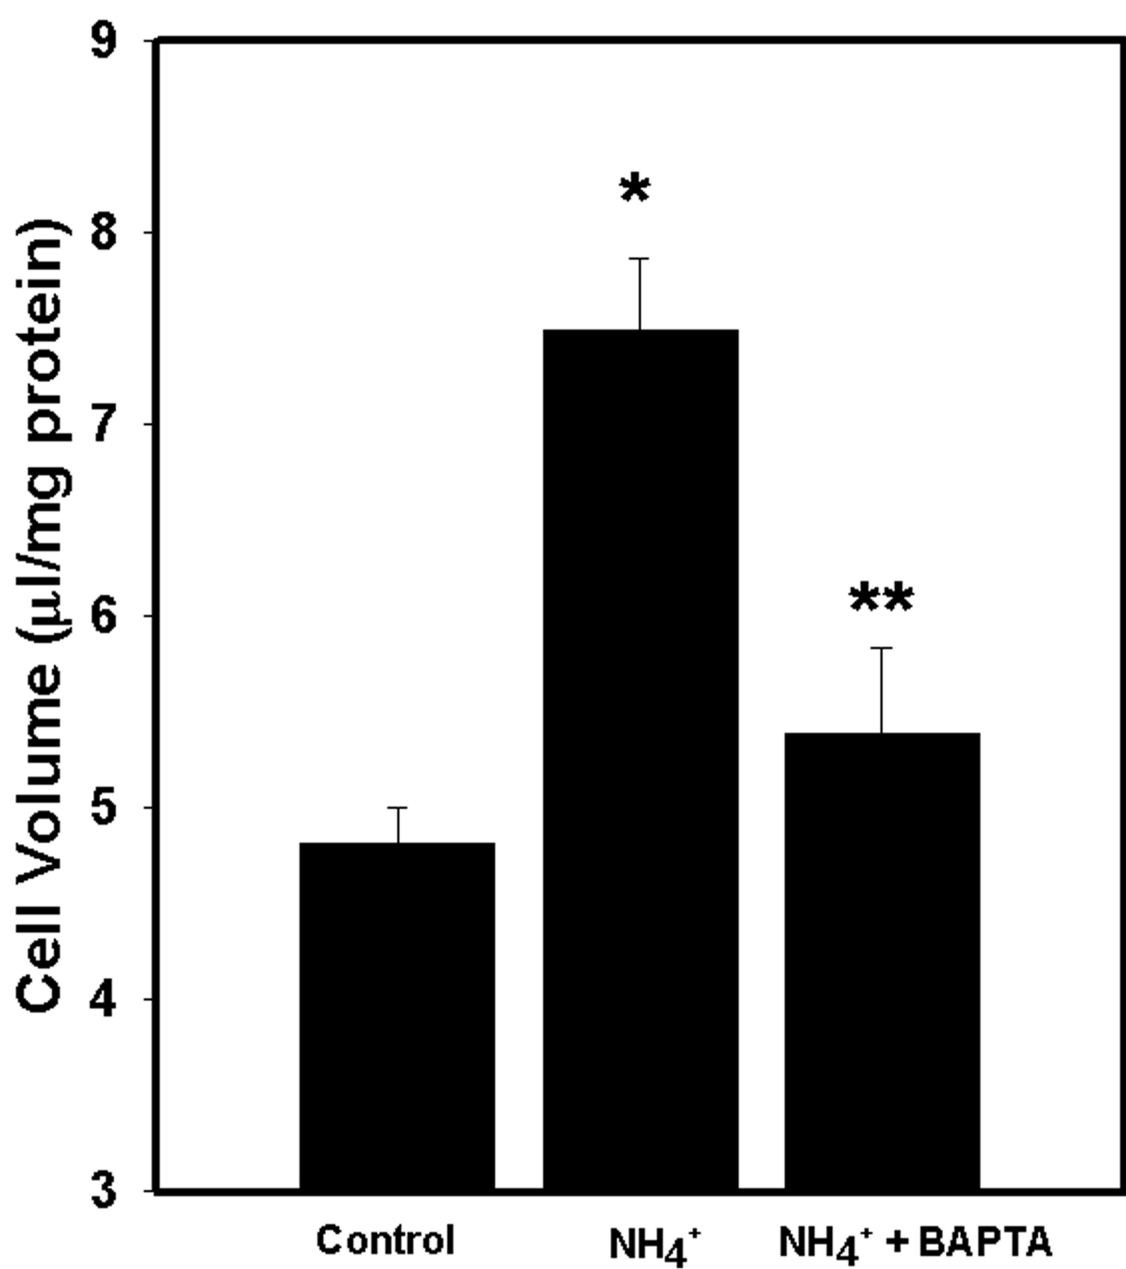

Supplement: NIHMS106246-supplement-Supp_Fig_2.pdf [file NIHMS106246-supplement-Supp_Fig_2.pdf]

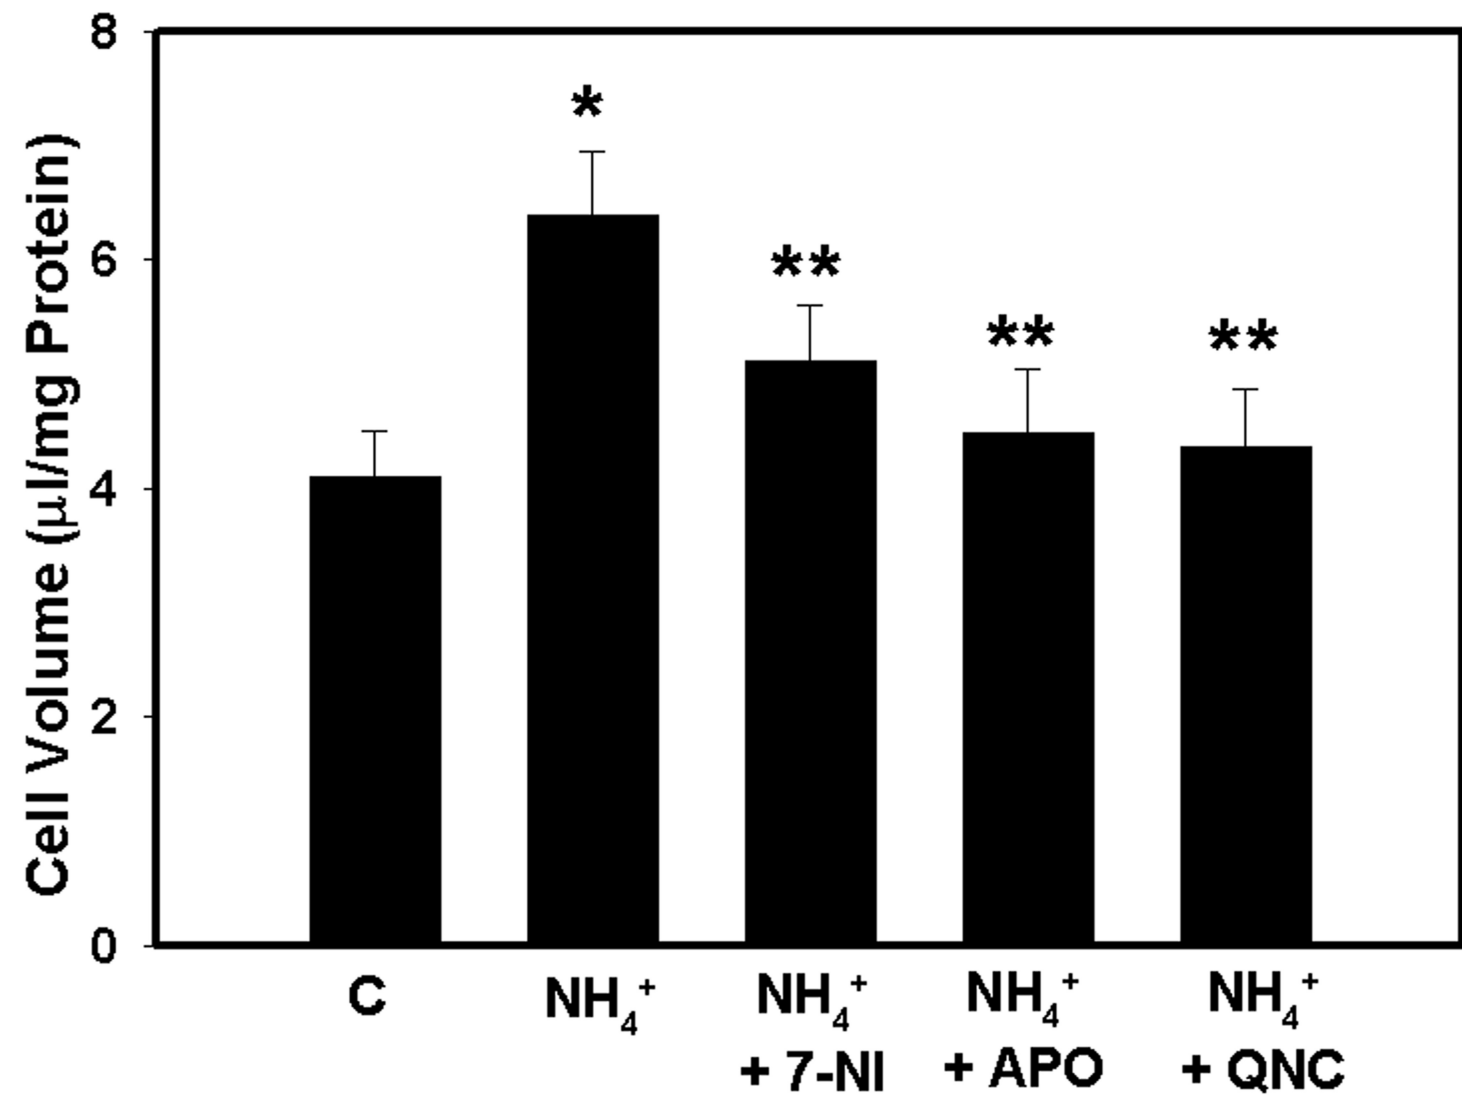

Supplement: NIHMS106246-supplement-Supp_Fig_3.pdf [file NIHMS106246-supplement-Supp_Fig_3.pdf]
